# Supplementary material for: [Retracted] Sex Differences in the Relationship between Abdominal Obesity and Cardiovascular Death in Elderly Patients with Permanent Pacemakers Implantation: A Retrospective Cohort Study
Source: Hindawi journal article supplement (doi:10.1155/2023/4383508), 2023-01-01
Supplement: f1 [file 4383508.f1.docx]

Supplements:

Sensitively analysis

Table S1 Hazard ratios (HR) and confidence intervals (CI) for the association between WC and cause-specific mortality by JCDCG definition in men and women

|  | **men** |  | **women** |  |
| --- | --- | --- | --- | --- |
| WC, cm | HR | 95% CI | HR | 95% CI |
| **Cardiovascular mortality** |  |  |  |  |
| ＜85 (M),＜80 (W) | Ref |  | Ref |  |
| 85-90 (M), 80-85 (W) | 3.06 | (0.50, 18.79) | 4.92 | (0.40, 60.54) |
| ＞90 (M), ＞85 (W) | 4.86 | (1.06, 22.22) | 6.02 | (0.58, 62.00) |
| P value for trend | 0.04 |  | 0.14 |  |
| **All- mortality** |  |  |  |  |
| ＜85 (M),＜80 (W) | Ref |  | Ref |  |
| 85-90 (M), 80-85 (W) | 0.81 | (0.29, 2.26) | 1.64 | (0.44, 6.14) |
| ＞90 (M), ＞85 (W) | 2.01 | (1.01, 3.98) | 1.29 | (0.32, 5.26) |
| P value for trend | 0.04 |  | 0.76 |  |

Adjusted factors for age, BMI, NYHA class , structure heart disease , hypertension, diabetes, atrial fibrillation, heart rate, LVEF, LAD, LVEDD, and medication (ACEI/ARB, beta-blockers, amiodarone, CCB, digitalis, statins, and aspirin). Abbreviations: ACEI = angiotensin- converting enzyme inhibitor; ARB = angiotensin receptor blocker; BMI = body mass index; LVEF = left ventricular ejection fraction; LAD = lest left atrial dimension; LVEDD = left ventricular end-systolic dimension; NYHA = New York Heart Association; CCB = calcium channel clockers; WC = waist circumference; JCDCG = the Joint Committee for Developing Chinese Guidelines

Table S2 Hazard ratios (HRs) and Confidence Intervals (CIs) for the Association Between waist circumference quartile and all-cause mortality in men and women

| WC | # | $ |
| --- | --- | --- |
| **Men** |  |  |
| 1st quartile | Ref | Ref |
| 2nd quartile | 4.31 (1.23,15.13) | 3.91 (1.05,14.47) |
| 3rd quartile | 6.80 (1.84, 23.51) | 4.52 (1.19,17.11) |
| P value for trend | 0.003 | 0.05 |
| **Women** |  |  |
| 1st quartlile | Ref | Ref |
| 2nd quartile | 3.39 (0.79,14.59) | 4.01 (0.84, 19.27) |
| 3rd quartile | 2.75 (0.54,13.89) | 2.25 (0.37, 13.71) |
| P value for trend | 0.35 | 0.59 |

Adjusted factors for age, BMI, NYHA class , structure heart disease, hypertension, diabetes, atrial fibrillation, heart rate, LVEF, LAD, LVEDD, and medication (ACEI/ARB, beta-blockers, amiodarone, CCB, digitalis, statins, and aspirin). Abbreviations: ACEI = angiotensin- converting enzyme inhibitor; ARB = angiotensin receptor blocker; BMI = body mass index; LVEF = left ventricular ejection fraction; LAD = lest left atrial dimension; LVEDD = left ventricular end-systolic dimension; NYHA = New York Heart Association; CCB = calcium channel clockers; WC = waist circumference.

# excluding participants with BMI <18.5 kg/m2. $ excluding participants who had a follow-up time of less than 1 year
